# Supplementary material for: Metabolic engineering of the thermophilic filamentous fungus Myceliophthora thermophila to produce fumaric acid
Source: PubMed Central journal article supplement (PMC6278111; doi:10.1186/s13068-018-1319-1), 2018-12-03

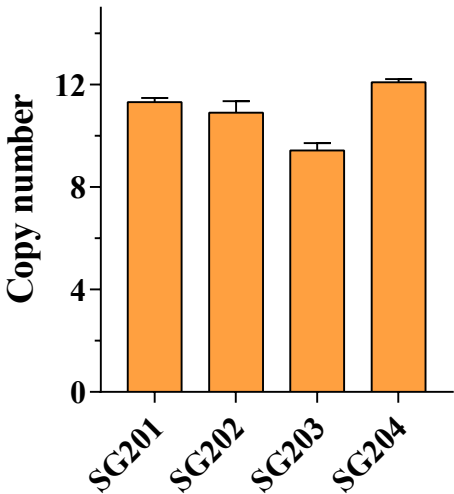

Supplement: 13068_2018_1319_MOESM2_ESM.pdf [file 13068_2018_1319_MOESM2_ESM.pdf]
