# Supplementary material for: Metabolic engineering of the thermophilic filamentous fungus Myceliophthora thermophila to produce fumaric acid
Source: PubMed Central journal article supplement (PMC6278111; doi:10.1186/s13068-018-1319-1), 2018-12-03
Supplement: 13068_2018_1319_MOESM4_ESM.pdf [file 13068_2018_1319_MOESM4_ESM.pdf]

**Table S1.** List of PCR primers used in this study.

| Name                                             | Prime sequence (5'-3')                                                      | Notes                       |
|--------------------------------------------------|-----------------------------------------------------------------------------|-----------------------------|
| <b>Construction of expression vector</b>         |                                                                             |                             |
| Ptef-F                                           | GGCTGACTTGAAGTAATCTCTGCAGATCTCATGTACCTTGACGTCCTCCGAG                        | Cloning of <i>Ptef</i>      |
| Ptef-R                                           | TGTTTCAGGATCTCCTTGAGCTCGCCATTCTGAAGAACGAAACTGGCGACT                         | Cloning of <i>Ptef</i>      |
| Spmae-F                                          | CGCAAGTCGCCAGTTTCGTTCTTCAGAATGGGCGAGCTCAAGGAGATC                            | Cloning of <i>Spmae</i>     |
| Spmae-R                                          | TGATGATTTTCAGTAACGTTAAGTGGATCCGAATTCGATTCAGAGGCTGTCGTGGTCCGA                | Cloning of <i>Spmae</i>     |
| gpdA-F                                           | ACTTGAAGTAATCTCTGCAGATCTTAAATTAACTCGAGTGACGGTGCTTTTCACCTCTC                 | Cloning of <i>PgpdA</i>     |
| gpdA-R                                           | TGATTTAGTAACGTTAAGTGGATCCGAATTCGATATCGTTTAAACACTAGTTTGGATTTC<br>TGTGATGTGGG | Cloning of <i>PgpdA</i>     |
| Rofum-F                                          | ACTCACCTCCCACATCACAGAAATCAAACTAGTATGAACAACCTCTCCTCGTCT                      | Cloning of <i>Rofum</i>     |
| Rofum-R                                          | TAACGTTAAGTGGATCCGAATTCGATATCGTTTAAACTTAATCCTTGGCAGAGATCAT                  | Cloning of <i>Rofum</i>     |
| Ecfum-F                                          | CTCCCCACATCACAGAAATCAAACTAGTATGAATACAGTACG                                  | Cloning of <i>Ecfum</i>     |
| Ecfum-R                                          | GATCCGAATTCGATATCGTTTAAACTTAACGCCCGGCTTTCATA                                | Cloning of <i>Ecfum</i>     |
| Ckfum-F                                          | CTCCCCACATCACAGAAATCAAACTAGTACTAGTATGCTGGCGGC                               | Cloning of <i>Ckfum</i>     |
| Ckfum-R                                          | GATCCGAATTCGATATCGTTTAAACGTTTAAACTCAATCCTTCGGGC                             | Cloning of <i>Ckfum</i>     |
| Msfum-F                                          | CCTCCCCACATCACAGAAATCAAACTAGTATGACAGCGTTTCGTATTGAA                          | Cloning of <i>Msfum</i>     |
| Msfum-R                                          | GTTAAGTGGATCCGAATTCGATATCGTTTAAACTTATTTCAGCTACCAACCA                        | Cloning of <i>Msfum</i>     |
| Peif-F                                           | GTTTGCAGTTGGCTGACTTGAAGTAATCTCTGCAGATCTCACAGCAGTTCGCACGCTCC                 | Cloning of <i>Peif</i>      |
| Peif-R                                           | TCGGCTTCTTGCCGCTTTTGCCAACCTTTGTGCCATCTTGTGTTGTTGTGTTG                       | Cloning of <i>Peif</i>      |
| Mtsfc-F                                          | TCACCGTTACGCTCCTCAACACAACAACAACAAGATGGCGACAAAAGTTGGCAA                      | Cloning of <i>Mtsfc</i>     |
| Mtsfc-R                                          | CAAGCTGTTTGATGATTTTCAGTAACGTTAAGTGGATCCTCACTCCTCGTACCTCCAC                  | Cloning of <i>Mtsfc</i>     |
| <b>Construction of sgRNA expressing plasmids</b> |                                                                             |                             |
| U6p-F                                            | AGGATCGGTGGAGTGAAGTTCGGAA                                                   | Cloning of U6 promotor      |
| U6p-fr1-R                                        | CTCTAAAACCGCTACGATGATGACGGGCGAGGAAAGAAAAGAAAGAGAGGAG                        | Cloning of U6 promotor      |
| U6p-fr2-R                                        | TAGCTCTAAAAGTCTTGTCAAGGACTGTGACGAGGAAAGAAAAGAAAAGAAG                        | Cloning of U6 promotor      |
| U6p-Mtfum-R                                      | GCTCTAAAACAGTATTTGTCGGCCGGCACCGAGGAAAGAAAAGAAA                              | Cloning of U6 promotor      |
| U6p-moc-R                                        | TCTAGCTCTAAAAGTATCCGAGTGTCTCTGACGAGGAAAGAAAAGAAAAGAAGA                      | Cloning of U6 promotor      |
| U6p-Mtmae-R                                      | TTCTAGCTCTAAAACCCACGGTAAATGCGGATCCCGAGGAAAGAAAAGAAAAGAGAG                   | Cloning of U6 promotor      |
| U6p-neo-R                                        | CTAAAACAGTCATAGCCGAATAGCCTCGAGGAAAGAAAAGAAAAGAGAGGAG                        |                             |
| g-fr1-F                                          | CTTTTCTTTCTTCTCCTCGCCGTCATCATCGTAGGCGGTTTTAGAGCTAGAAATAG                    | <i>fr1</i> -gRNA5'          |
| g-fr2-F                                          | TTTCTTTCTTCTCCTCGTCACAGTCCTTGACAAGCAGTTTTAGAGCTAGAAATAG                     | <i>fr2</i> -gRNA5'          |
| g-Mtfum-F                                        | CTTTTCTTTCTTCTCCTCGGTGCCGCGACAAATACTGTTTTAGAGCT                             | <i>Mtfum</i> -gRNA5'        |
| g-moc-F                                          | CTTTTCTTTCTTCTCCTCGTCAGGAACACTCGGATACAGTTTTAGAGCTAGAAATAG                   | <i>moc</i> -gRNA5'          |
| g-Mtmae-F                                        | CTTTTCTTTCTTCTCCTCGGGATCCGATTTACCGTGGGTTTTAGAGCTAGAAATAGCA                  | <i>Mtmae</i> -gRNA5'        |
| g-neo-F                                          | CTTTCCTCGAGGCTATTCGGCTATGACTGTTTTAGAGCTAGAAATAGCAAG                         | <i>neo</i> -gRNA5'          |
| gRNA-R                                           | AAAAAGCACCGACTCGGTGCCACTT                                                   | gRNA3'                      |
| <b>Donor DNA construction</b>                    |                                                                             |                             |
| neo-F                                            | CGACGTTAACTGATATTGAAGGA                                                     | Cloning of <i>PtrpC-neo</i> |
| neo-R                                            | TCAGAAGAAGCTCGTCAAGAA                                                       | Cloning of <i>PtrpC-neo</i> |
| nat-F                                            | CGACGTTAACTGATATTGAAGGA                                                     | Cloning of <i>PtrpC-nat</i> |

|                                        |                                                             |                                   |
|----------------------------------------|-------------------------------------------------------------|-----------------------------------|
| nat-R                                  | CTATTATCAGGGGCACGGCATG                                      | Cloning of <i>PtrpC-nat</i>       |
| Dfr1-5'-F                              | GATGTGGAGTGGGCGCTTACACAGTACACGAGGACTTGCTTCTTACTCGACTCAGTGA  | <i>fr1</i> -upstream              |
| Dfr1-5'-R                              | CCCAAAAAATGCTCCTTCAATATCAGTTAACGTCGTCACCTTGTCGGTGTGGATGCCAT | <i>fr1</i> -upstream              |
| Dfr1-3'-F                              | GCATCGCCTTCTATCGCCTTCTTGACGAGTTCTTCTGAGGCAACTCGGTACCCCGCTTC | <i>fr1</i> -downstream            |
| Dfr1-3'-R                              | AAGTCATGTGATTGTAATCGACCGACGGAATTGAGGATGTTGTGGATCAGCATCGCCTG | <i>fr1</i> -downstream            |
| Dfr2-5'-F                              | GATGTGGAGTGGGCGCTTACACAGTACACGAGGACTTTCATATGGTCCATTGACAGTG  | <i>fr2</i> -upstream              |
| Dfr2-5'-R                              | CCCAAAAAATGCTCCTTCAATATCAGTTAACGTCGTCACCGGCGAGATAGATGGTGTG  | <i>fr2</i> -upstream              |
| Dfr2-3'-F                              | GCATCGCCTTCTATCGCCTTCTTGACGAGTTCTTCTGAAGTTCCTGGCATGGCCATCAC | <i>fr2</i> -downstream            |
| Dfr2-3'-R                              | AAGTCATGTGATTGTAATCGACCGACGGAATTGAGGATGCCTGCTGGAAGAGGTAGTTG | <i>fr2</i> -downstream            |
| DMtfum-5'-F                            | GTGGAGTGGGCGCTTACACAGTACACGAGGACTTGGAAGTGGCGTGGCATAATTCG    | <i>Mtfum</i> -upstream            |
| DMtfum-5'-R                            | AAAATGCTCCTTCAATATCAGTTAACGTCGTTAGATCTCGCCGAACGCATCGCT      | <i>Mtfum</i> -upstream            |
| DMtfum-3'-F                            | CGCCTTCTATCGCCTTCTTGACGAGTTCTTCTGAAGTGCATCGACCACTTCCCC      | <i>Mtfum</i> -downstream          |
| DMtfum-3'-R                            | CATGTGATTGTAATCGACCGACGGAATTGAGGATGGCCGTTTCATGCCACCGATC     | <i>Mtfum</i> -downstream          |
| Dmoc-5'-F                              | GATGTGGAGTGGGCGCTTACACAGTACACGAGGACTTTGCTTGGGTAGCTACCTATTT  | <i>moc</i> -upstream              |
| Dmoc-5'-R                              | CCCAAAAAATGCTCCTTCAATATCAGTTAACGTCGTCATTGCTGCGGATGATCTTCTG  | <i>moc</i> -upstream              |
| Dmoc-3'-F                              | AGCTCTTACATGAGCATGCCGTGCCCTGATAATAGTCTCTGGCGCCACATTCTCTG    | <i>moc</i> -downstream            |
| Dmoc-3'-R                              | AAGTCATGTGATTGTAATCGACCGACGGAATTGAGGATTCCTCCTCTCACGATGAGGG  | <i>moc</i> -downstream            |
| DMtmae-5'-F                            | GATGTGGAGTGGGCGCTTACACAGTACACGAGGACTTCGATAAGAGCGAGTTATCAGTG | <i>Mtmae</i> -upstream            |
| DMtmae-5'-R                            | CCAAAAAATGCTCCTTCAATATCAGTTAACGTCGTCAGAAGTAGGGGTGGTTCAGCAG  | <i>Mtmae</i> -upstream            |
| DMtmae-3'-F                            | CGCATCGCCTTCTATCGCCTTCTTGACGAGTTCTTCTGACAGATGACATCGACTACATC | <i>Mtmae</i> -downstream          |
| DMtmae-3'-R                            | AAGTCATGTGATTGTAATCGACCGACGGAATTGAGGATCACTTCAATCTCGACTTCGTT | <i>Mtmae</i> -downstream          |
| <b>PCR analysis of gene disruption</b> |                                                             |                                   |
| fr1-out-F                              | TACCCACGGTTGCCGAATCTT                                       | Detecting <i>fr1</i> disruption   |
| fr1-out-R                              | GGTCCCCCAGGTGATGTGGAA                                       | Detecting <i>fr1</i> disruption   |
| fr2-out-F                              | AACTTCGCGGAGTGTGTCAT                                        | Detecting <i>fr2</i> disruption   |
| fr2-out-R                              | CGCGAGCCTTCTTGATGATCTT                                      | Detecting <i>fr2</i> disruption   |
| moc-out-F                              | CGACTGCTTCCAGAAGATCAT                                       | Detecting <i>moc</i> disruption   |
| moc-out-R                              | AGCAATTGCCGAACCTGGAA                                        | Detecting <i>moc</i> disruption   |
| Mtmae-out-F                            | GGATTCCCAACACGACAACAA                                       | Detecting <i>Mtmae</i> disruption |
| Mtmae-out-R                            | ATCGTTCAGAAGTGCCTCGTT                                       | Detecting <i>Mtmae</i> disruption |
| Mtfum-out-F                            | AGGATGGCAGCGAACACGAGAA                                      | Detecting <i>Mtfum</i> disruption |
| Mtfum-out-R                            | CTCGATCGCGGTTGCTGAT                                         | Detecting <i>Mtfum</i> disruption |
| <b>RT-qPCR analysis of copy number</b> |                                                             |                                   |
| Spmae-RT-F                             | GTCTACCTCTGCTGTTCCG                                         | Detecting <i>Spmae</i>            |
| Spmae-RT-R                             | AGCACCACGAGCAATGTTAATG                                      | Detecting <i>Spmae</i>            |
| Msfum-RT-F                             | CAATGCCAAGCCATGACAATG                                       | Detecting <i>Msfum</i>            |
| Msfum-RT-R                             | GCGATTAATTGAGCGGATTGC                                       | Detecting <i>Msfum</i>            |
| Ecfum-RT-F                             | AGTGAATTACTCGGCGGTGTG                                       | Detecting <i>Ecfum</i>            |
| Ecfum-RT-R                             | GCTGAGGAATGAGTTGCTTGC                                       | Detecting <i>Ecfum</i>            |
| Ckfum-RT-F                             | CGGTGTCGCTCTTCAAAATCG                                       | Detecting <i>Ckfum</i>            |
| Ckfum-RT-R                             | CTTCGTTCTGCGTCGGATTG                                        | Detecting <i>Ckfum</i>            |
| Rofum-RT-F                             | TGATGCCCTTCAAGCCAAATC                                       | Detecting <i>Rofum</i>            |
| Rofum-RT-R                             | ACACGAGCAATACCGTAAGTC                                       | Detecting <i>Rofum</i>            |

|            |                        |                        |
|------------|------------------------|------------------------|
| Mtsfc-RT-F | CGCTCTACACCATCGTCAAGG  | Detecting <i>Mtsfc</i> |
| Mtsfc-RT-R | TGTACTCGGGCTGCCACTG    | Detecting <i>Mtsfc</i> |
| actin-F    | TGCCATCTACGAGGGTTTC    | Detecting <i>Spmae</i> |
| actin-R    | TTGATGTCACGGACAATTTCAC | Detecting <i>Spmae</i> |
